# Supplementary material for: Mycophenolate suppresses inflammation by inhibiting prostaglandin synthases: a study of molecular and experimental drug repurposing
Source: PeerJ. 2021 Apr 30;9:e11360. doi: 10.7717/peerj.11360 (PMC8092108; doi:10.7717/peerj.11360)
Supplement: Supplemental Information 9 — The rat paw size was measured over time scale from 1-6 hours. [file peerj-09-11360-s009.xlsx]

## Sheet: Carrageenan
		rat no.
	Time (h)	1	2	3	4	5	6	7
	1	0.75	0.75	0.73	0.73	0.73	0.75	0.7
	2	0.75	0.75	0.76	0.76	0.76	0.8	0.75
	3	0.75	0.8	0.77	0.77	0.77	0.8	0.75
	4	0.75	0.8	0.77	0.77	0.77	0.8	0.75
	5	0.75	0.8	0.77	0.77	0.77	0.8	0.75
	6	0.8	0.85	0.81	0.81	0.81	0.75	0.85

## Sheet: control
		rat no.
	Time (h)	1	2	3	4	5	6	7
	1	0.3	0.3	0.3	0.3	0.3	0.3	0.3
	2	0.3	0.3	0.3	0.3	0.3	0.3	0.3
	3	0.3	0.3	0.3	0.3	0.3	0.3	0.3
	4	0.3	0.3	0.3	0.3	0.3	0.3	0.3
	5	0.3	0.3	0.3	0.3	0.3	0.3	0.3
	6	0.3	0.3	0.3	0.3	0.3	0.3	0.3

## Sheet: indomethacin
		rat no.
	Time (h)	1	2	3	4	5	6	7
	1	0.7	0.7	0.7	0.75	0.75	0.75	0.7
	2	0.7	0.6	0.55	0.5	0.6	0.6	0.55
	3	0.45	0.43	0.4	0.4	0.42	0.5	0.44
	4	0.35	0.38	0.4	0.4	0.39	0.4	0.37
	5	0.35	0.37	0.35	0.4	0.37	0.4	0.37
	6	0.55	0.52	0.5	0.65	0.6	0.6	0.59

## Sheet: celecoxib
		rat no.
	Time (h)	1	2	3	4	5	6	7
	1	0.75	0.71	0.7	0.75	0.73	0.75	0.75
	2	0.75	0.65	0.65	0.7	0.67	0.68	0.6
	3	0.55	0.45	0.5	0.5	0.49	0.5	0.4
	4	0.5	0.48	0.45	0.4	0.45	0.45	0.5
	5	0.4	0.4	0.45	0.4	0.43	0.38	0.42
	6	0.6	0.56	0.55	0.65	0.55	0.6	0.5

## Sheet: Mycophenolate mofetil 1
Mycophenolate mofetil 50mg/kg						rat no.
					Time (h)	1	2	3	4	5	6	7
					1	0.75	0.75	0.75	0.75	0.75	0.75	0.75
					2	0.75	0.7	0.7	0.65	0.7	0.66	0.68
					3	0.65	0.65	0.6	0.55	0.6	0.62	0.58
					4	0.55	0.55	0.5	0.5	0.52	0.53	0.51
					5	0.45	0.5	0.45	0.45	0.46	0.46	0.46
					6	0.6	0.6	0.5	0.65	0.56	0.58	0.6

## Sheet: Mycophenolate mofetil 2
Mycophenolate mofetil 25 mg/Kg							rat no.
						Time (h)	1	2	3	4	5	6	7
						1	0.74	0.75	0.75	0.75	0.77	0.75	0.74
						2	0.7	0.7	0.7	0.65	0.71	0.75	0.69
						3	0.59	0.6	0.55	0.5	0.55	0.65	0.57
						4	0.46	0.5	0.45	0.5	0.47	0.45	0.48
						5	0.45	0.5	0.4	0.45	0.45	0.45	0.45
						6	0.57	0.6	0.5	0.65	0.6	0.55	0.54

## Sheet: Mycophenolate mofetil 3
Mycophenolate mofetil 12.5 mg Kg					rat no.
				Time (h)	1	2	3	4	5	6	7
				1	0.75	0.75	0.73	0.73	0.73	0.75	0.7
				2	0.75	0.75	0.76	0.76	0.76	0.8	0.75
				3	0.75	0.8	0.77	0.77	0.77	0.8	0.75
				4	0.75	0.8	0.77	0.77	0.77	0.8	0.75
				5	0.75	0.8	0.77	0.77	0.77	0.8	0.75
				6	0.8	0.85	0.81	0.81	0.81	0.75	0.85
